# Supplementary material for: The Antifibrosis Effects of Peroxisome Proliferator-Activated Receptorδon Rat Corneal Wound Healing after Excimer Laser Keratectomy
Source: Hindawi journal article supplement (doi:10.1155/2014/464935), 2014-01-01
Supplement: f1 [file 464935.f1.pdf]

## Supplementary material

### Part 1. The flow diagram of enucleated eyes

Enucleated eyes were sorted into different outcome measurements. Here is the flow diagram of enucleated eyes:

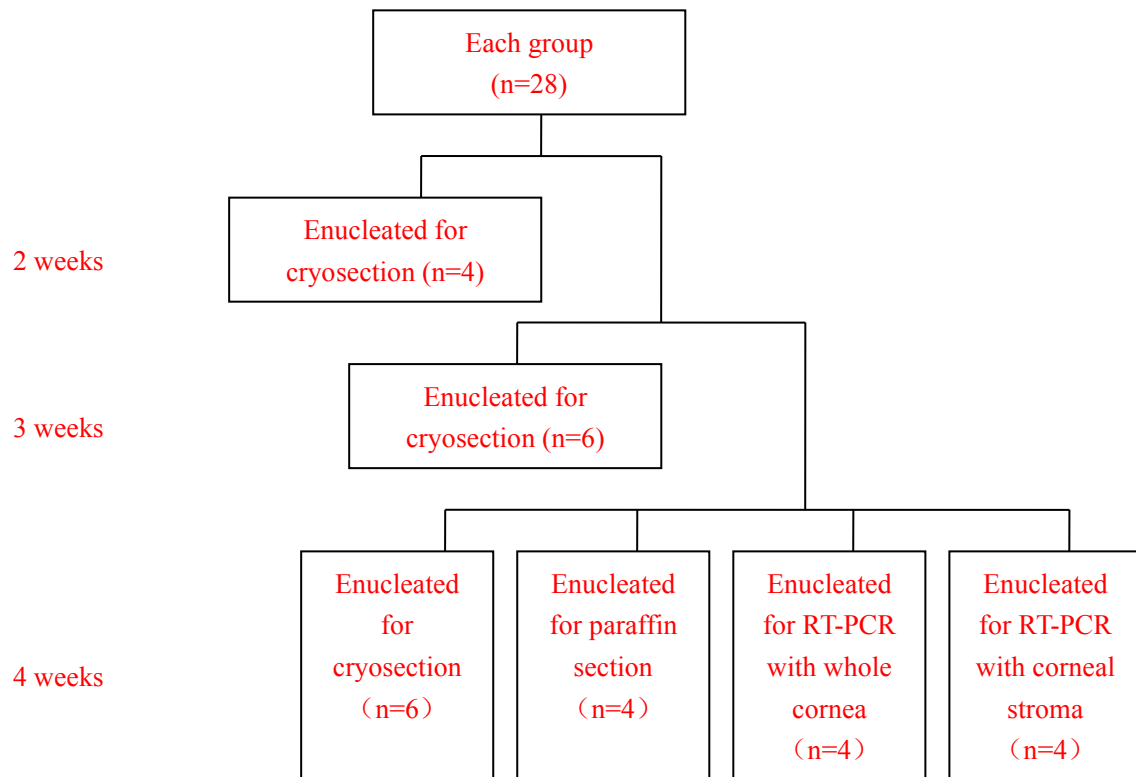

### Part 2. Effects of PPAR $\delta$ agonist/antagonist on normal corneal surface

#### Materials and methods:

12 rats with unwounded eyes were randomly divided into four groups, each consisting of six eyes: (1) unwounded corneas treated with 3  $\mu$ l of PBS, (2) unwounded corneas treated with 3  $\mu$ l of GW501516 (Santa Cruz, CA, USA) at a concentration of 1 mM, (3) unwounded corneas treated with 3  $\mu$ l of GSK3787 (Santa Cruz, CA, USA) at a concentration of 1 mM and (4) unwounded corneas treated with 3  $\mu$ l GW501516 and GSK3787 at a concentration of 1 mM. Liquids were subconjunctivally applied twice per week for four weeks.

#### Result:

No haze or corneal neovascularization was found in the uninjured corneas. H & E staining of the tissue showed no histological change. The data demonstrated that a subconjunctival injection of PPAR $\delta$  agonist/antagonist did not harm the normal cornea.

### Part 3. Effects of PPAR $\delta$ agonist/antagonist on circulating leukocyte counts

#### Materials and methods:

The blood samples (2 ml for each rat) were collected from the rats' orbital venous plexus

immediately before sacrifice. The complete blood counts were performed using an automated hematology analyzer (Sysmex SE-9000™, TOA, Japan).

**Result:**

As shown in Table 1, differences were not detected between any of the groups.

Table 1. WBC counts in peripheral blood after subconjunctival injection of PPAR $\delta$  agonist/antagonist for four weeks

|                                        | n | WBC counts ( $\times 10^9$ /L) |
|----------------------------------------|---|--------------------------------|
| unwounded corneas + PBS group          | 3 | 11.26 $\pm$ 2.65               |
| unwounded corneas + GW501516 group     | 3 | 11.15 $\pm$ 1.78               |
| unwounded corneas + GSK3787 group      | 3 | 9.35 $\pm$ 3.69                |
| unwounded corneas + GW-GSK group       | 3 | 11.27 $\pm$ 2.65               |
| laser ablated corneas + PBS group      | 3 | 9.14 $\pm$ 2.66                |
| laser ablated corneas + GW501516 group | 3 | 10.33 $\pm$ 2.68               |
| laser ablated corneas + GSK3787 group  | 3 | 10.58 $\pm$ 1.99               |
| laser ablated corneas + GW-GSK group   | 3 | 9.95 $\pm$ 3.65                |
